# Supplementary material for: Development and Evaluation of Matrices Composed of β-cyclodextrin and Biodegradable Polyesters in the Controlled Delivery of Pindolol
Source: PubMed Central journal article supplement (PMC7355766; doi:10.3390/pharmaceutics12060500), 2020-05-30
Supplement: pharmaceutics-12-00500-s001.pdf [file pharmaceutics-12-00500-s001.pdf]

# Supplementary Materials: Development and Evaluation of Matrices Composed of $\beta$ -cyclodextrin and Biodegradable Polyesters in the Controlled Delivery of Pindolol

Agnieszka Lis-Cieplak, Filip Charuk, Marcin Sobczak, Anna Zgadzaj, Agata Drobniwska, Łukasz Szeleszczuk and Ewa Oledzka

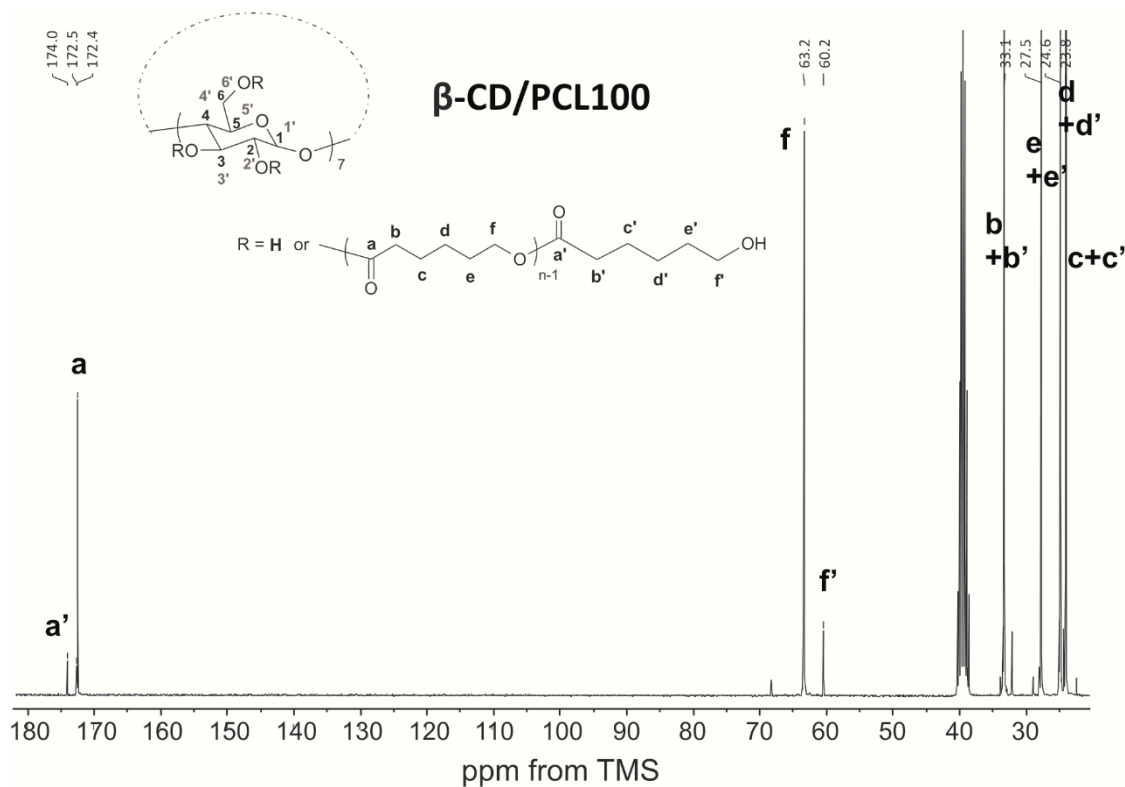

Figure S1.  $^{13}\text{C}$  NMR spectrum of the  $\beta$ -CD/PCL100 polymer in DMSO- $d_6$ .

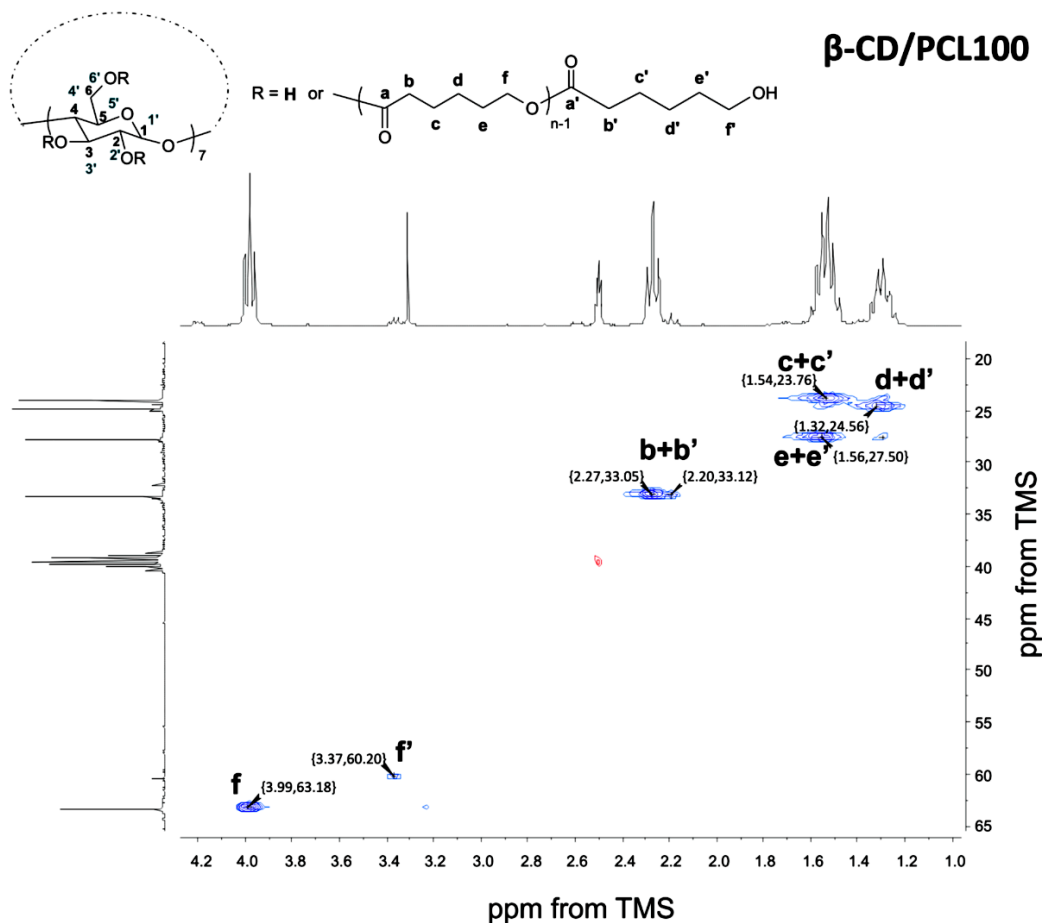

**Figure S2.** HSQC spectrum of the  $\beta$ -CD/PCL100 polymer in DMSO- $d_6$ .

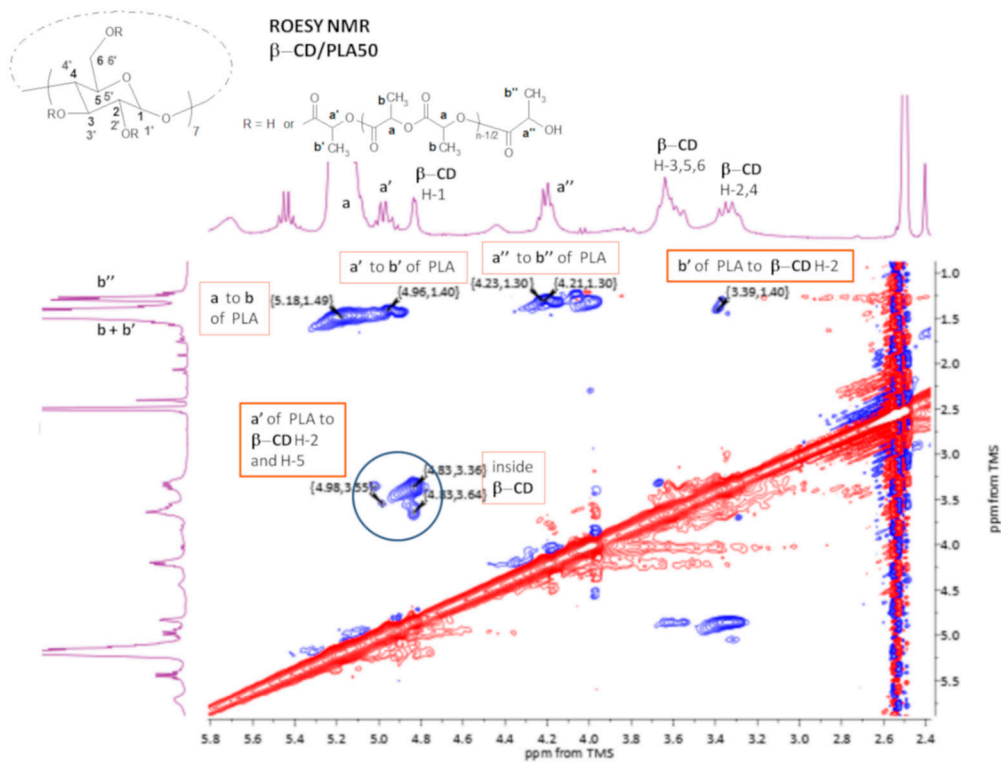

**Figure S3.** ROESY spectrum of the  $\beta$ -CD/PLA50 polymer in DMSO- $d_6$ , marked ROE cross-peaks between H-2 protons of  $\beta$ -CD and the first mer unit of PLA. Circled area is shown enlarged on the next figure.

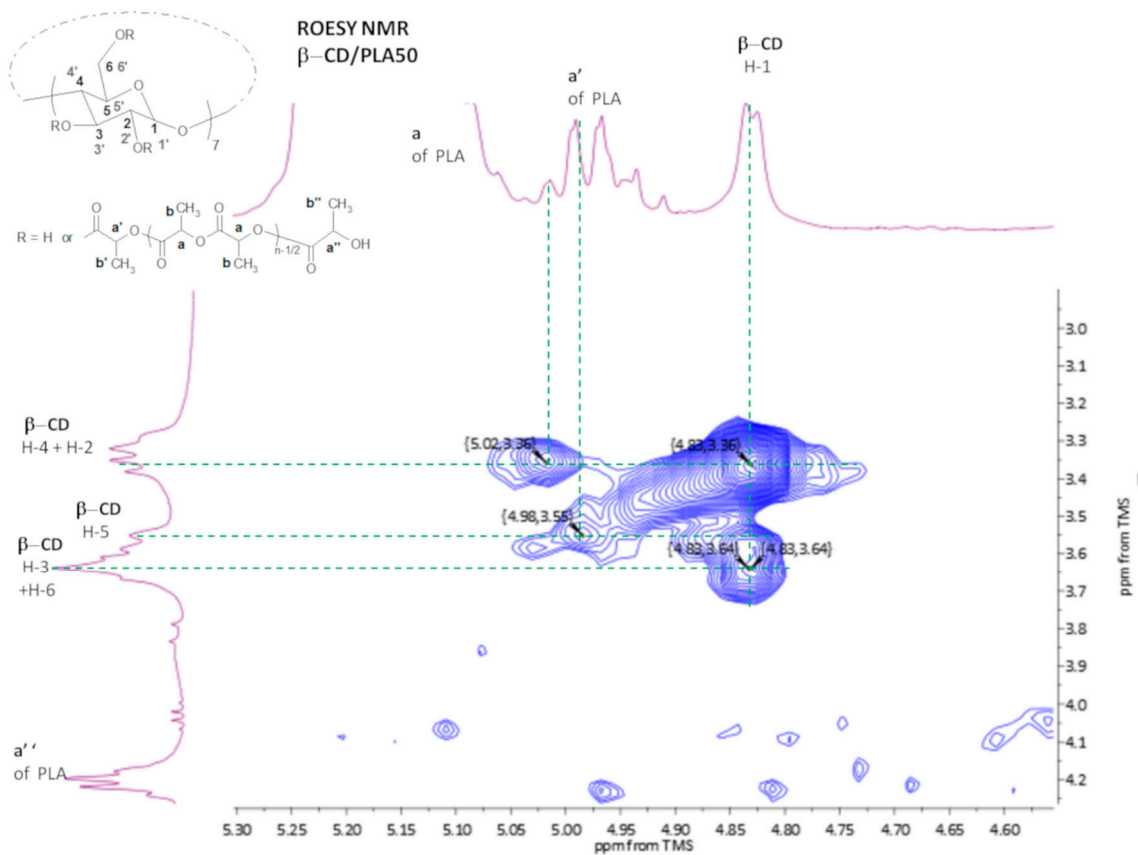

**Figure S4.** Selected region of ROESY spectrum of the β-CD/PLA50 polymer in DMSO-d<sub>6</sub>, the plot shows ROE cross-peaks between protons inside the glucose unit of β-CD, and between H-2 and H-5 protons of β-CD and the first mer unit of PLA (signal 'a').

SEC Analyser by Stanislaw Sosnowski

File: D:\Wyatt Installation\UNIWER.MED. WARSZAWA\

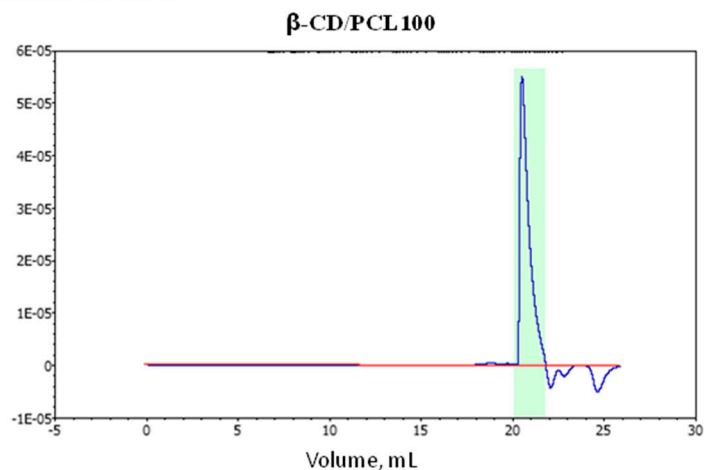

Comments:

Left (mL): 20,12  
 Right (mL): 21,75  
 Mn: 18,652  
 Mw: 20,750  
 Mw/Mn: 1,263  
 Fraction: 1,0000

**Figure S5.** The SEC elution curve of the β-CD/PCL100 polymer sample.

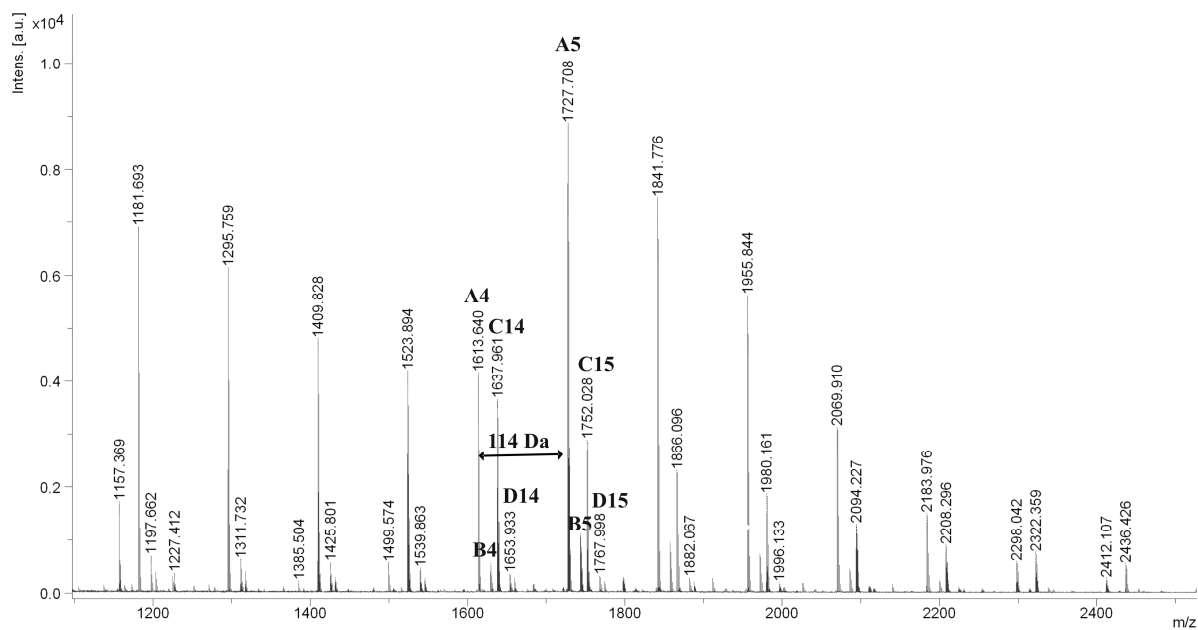

**Figure S6.** MALDI-TOF MS spectrum of the  $\beta$ -CD/PCL100 polymer obtained at 140 °C.

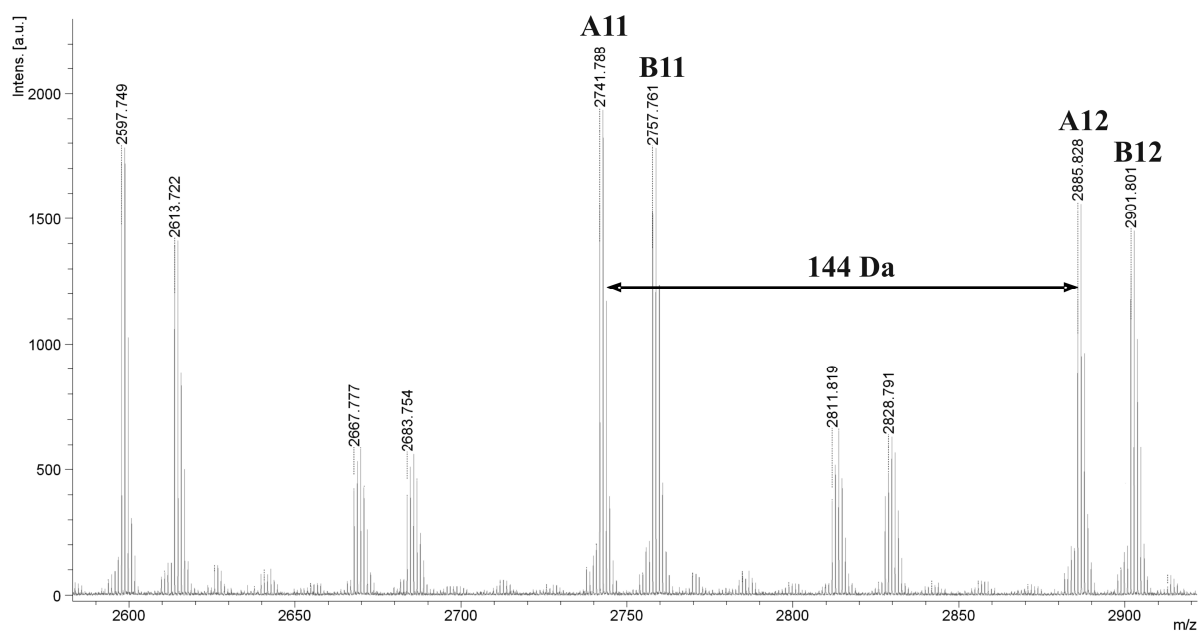

**Figure S7.** MALDI-TOF MS spectrum of the  $\beta$ -CD/PLA100 polymer obtained at 140 °C.

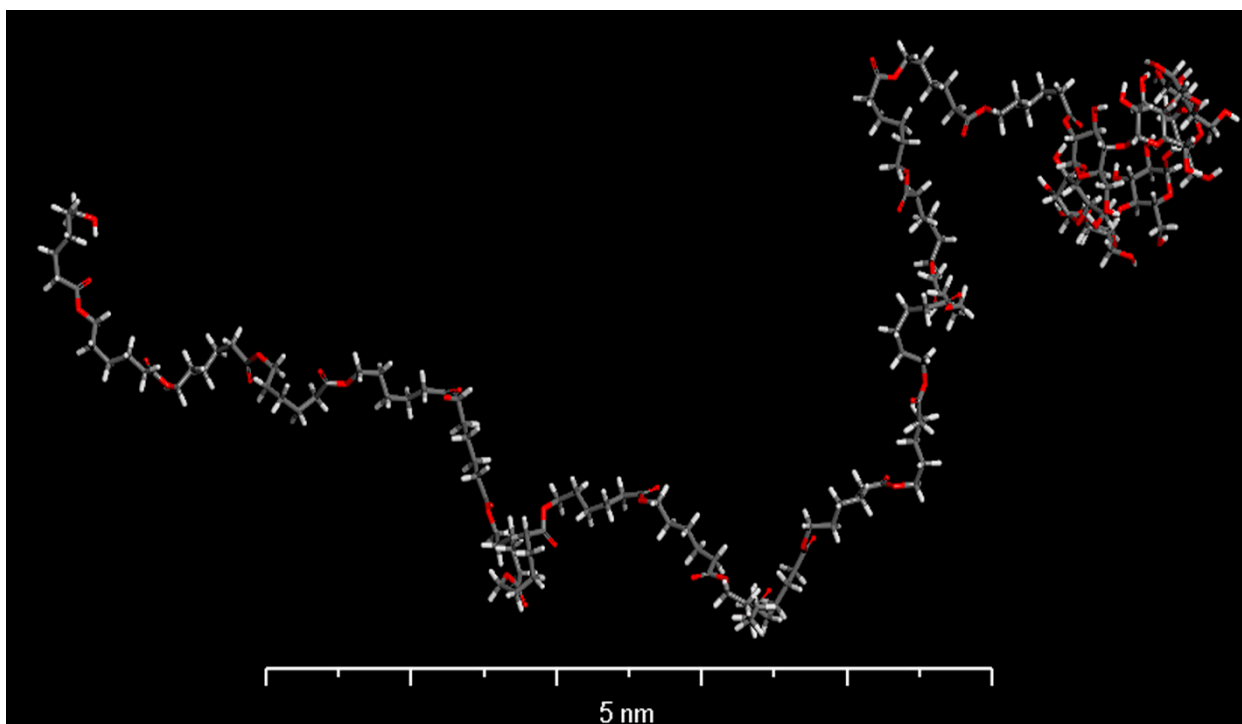

**Figure S8.** Monosubstituted (at the OH-2 position)  $\beta$ -CD/PCL, DP = 20, DS = 1.

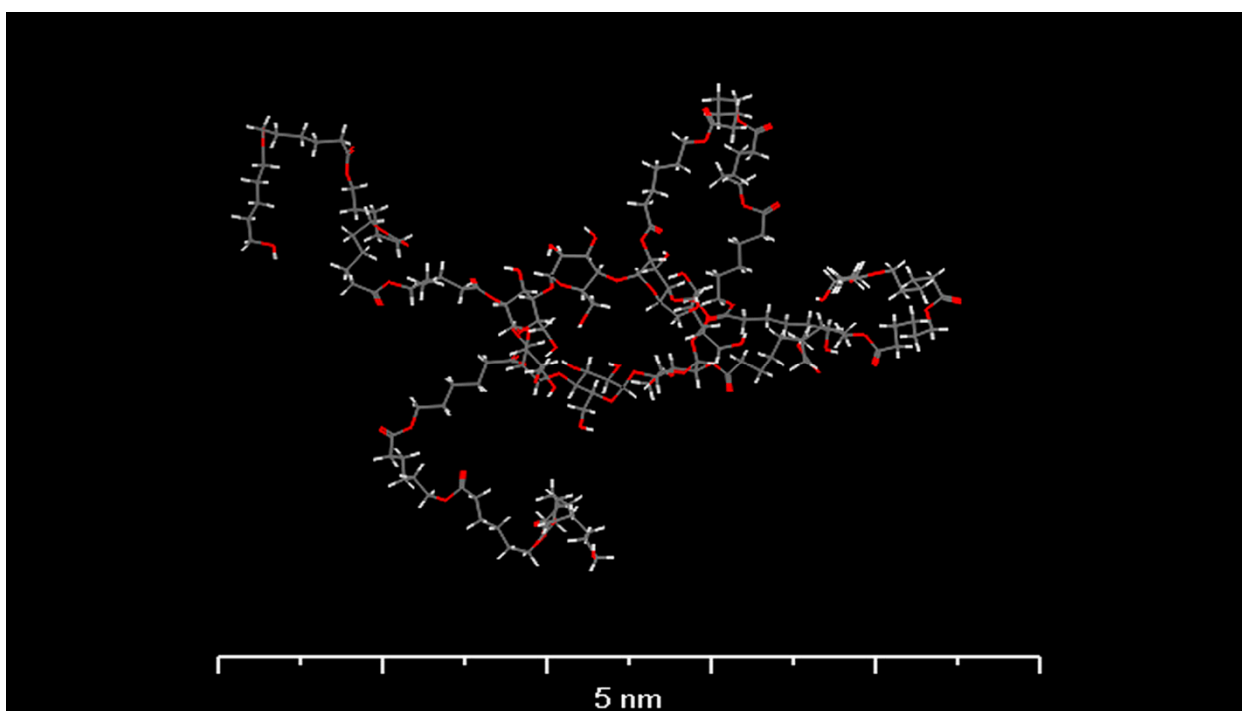

**Figure S9.** Monosubstituted (at the OH-2 position)  $\beta$ -CD/PCL, DP = 5, DS = 4.

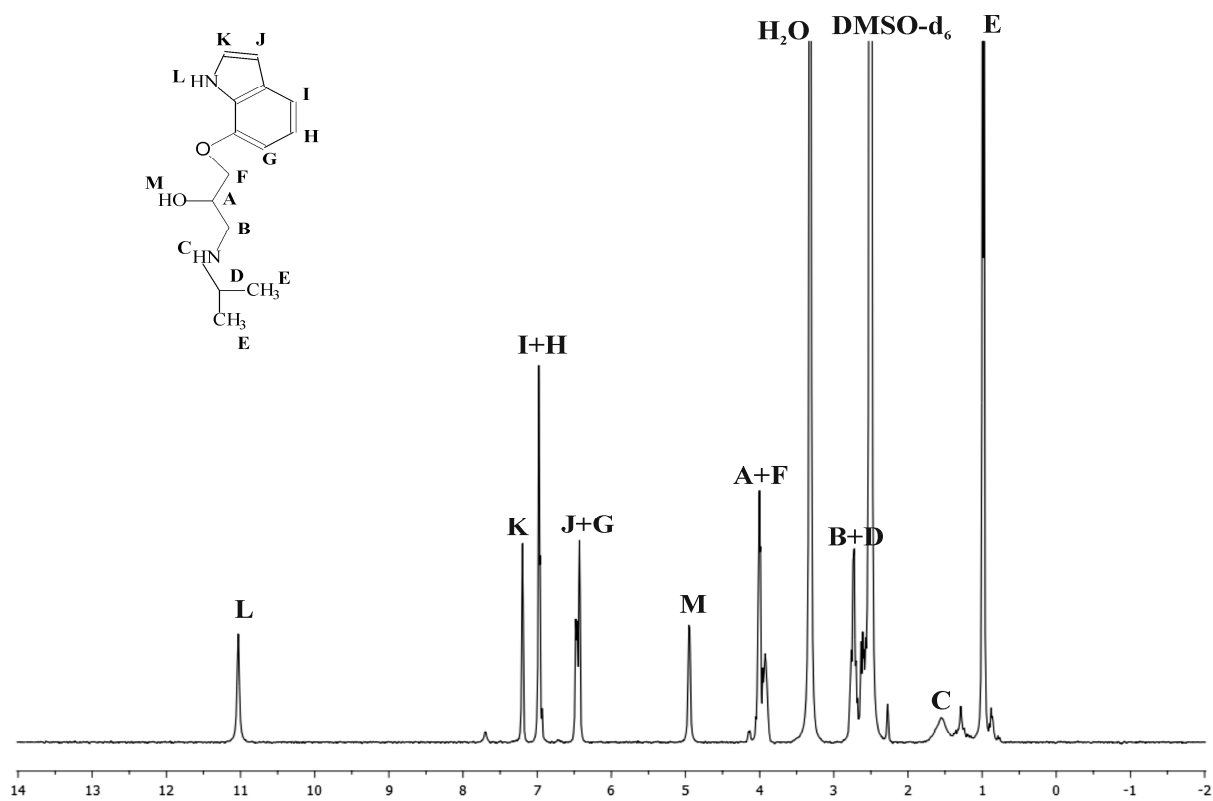

Figure S10. <sup>1</sup>H NMR spectrum of pindolol in DMSO-d<sub>6</sub>.

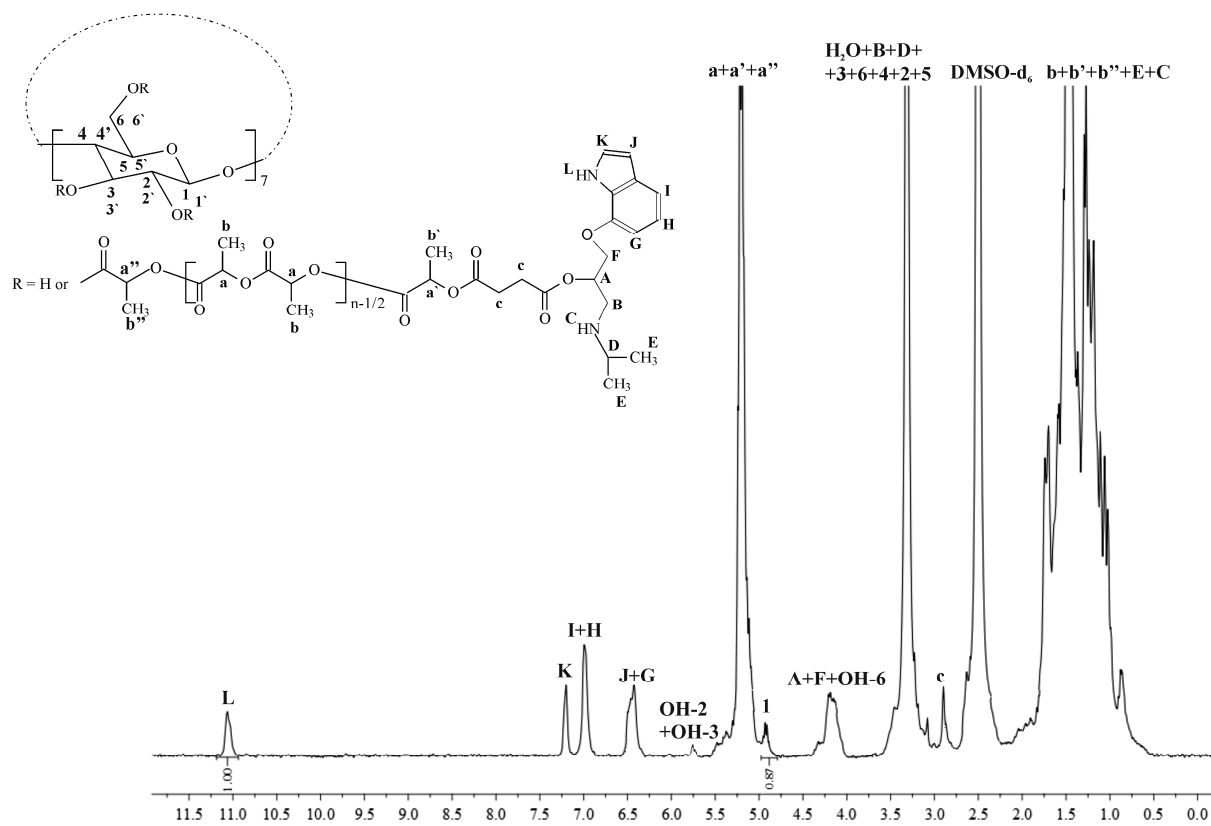

Figure S11. <sup>1</sup>H NMR spectrum of the β-CD/PLA100/PDL conjugate in DMSO-d<sub>6</sub>.
